# Supplementary material
Source: PubMed Central journal article supplement (PMC6686757)
Supplement: jamasurg-154-e192552-s001.pdf [file jamasurg-154-e192552-s001.pdf]

## Supplementary Online Content

Modi HN, Singh H, Fiorentino F, et al. Association of residents' neural signatures with stress resilience during surgery. *JAMA Surg*. Published online August 7, 2019.  
doi:10.1001/jamasurg.2019.2552

**eMethods.** Time to HbO<sub>2</sub> Peak and Nadir

**eResults.** Comparisons of Time to HbO<sub>2</sub> Peak and Nadir

**eTable 1.** Prefrontal channel locations

**eTable 2.** Changes in Cortical Haemodynamics in Each Channel in the Self-Paced Condition Among Q1 Residents

**eTable 3.** Changes in Cortical Haemodynamics in Each Channel in the Time Pressure Condition Among Q1 Residents

**eTable 4.** Changes in Cortical Haemodynamics in Each Channel in the Self-Paced Condition Among Q4 Residents

**eTable 5.** Changes in Cortical Haemodynamics in Each Channel in the Time Pressure Condition Among Q4 Residents

**eTable 6.** Differences in  $\Delta\text{HbO}_2$  Between Conditions in Each Channel Among Q1 Residents

**eTable 7.** Differences in  $\Delta\text{HbO}_2$  Between Conditions in Each Channel Among Q4 Residents

**eFigure 1.** Prefrontal Channel Positions

**eFigure 2.** Within-Group Comparison of Time to HbO<sub>2</sub> Concentration Peak and Time to HbO<sub>2</sub> Concentration Nadir

**eFigure 3.** Between-Group Comparison of Time to HbO<sub>2</sub> Concentration Peak and Time to HbO<sub>2</sub> Concentration Nadir

**eFigure 4.** Time Courses Demonstrating the Change in Oxygenated Haemoglobin in Individual Channels in Q1 and Q4 Residents During the Self-Paced Condition

**eFigure 5.** Time Courses Demonstrating the Change in Oxygenated Haemoglobin in Individual Channels in Q1 and Q4 Residents During the Time Pressure Condition

This supplementary material has been provided by the authors to give readers additional information about their work.



## **eMETHODS: Time to HbO<sub>2</sub> Peak and Nadir**

In order to explore the differences in temporal dynamics of HbO<sub>2</sub> concentration between Q1 and Q4 groups, the median time for HbO<sub>2</sub> concentration maxima following task onset (“time to peak”) and median time for HbO<sub>2</sub> minima (“time to nadir”) were compared between Q1 and Q4 using the Mann-Whitney U test. Additionally, for each group, time to HbO<sub>2</sub> peak was compared to time to HbO<sub>2</sub> nadir during each condition using the Wilcoxon Signed Rank test.

## **eRESULTS**

### **Within-Group Comparisons of Time to HbO<sub>2</sub> Peak and Nadir**

Time to HbO<sub>2</sub> peak (TTP) was shorter than time to HbO<sub>2</sub> nadir (TTN) for Q1 residents, especially under TP (eFigure 2 in the Supplement). However, for Q4 residents, TTP was significantly longer than the TTN (eFigure 2 in the Supplement).

### **Between-Group Comparisons of Time to HbO<sub>2</sub> Peak and Nadir**

In both SP and TP conditions, HbO<sub>2</sub> concentration peaked earlier in Q1 than in Q4 in the bilateral VLPFC, left dorsomedial PFC and right DLPFC (eFigure 3a in the Supplement). In the SP condition, a trend towards shorter TTN was observed amongst Q4 compared to Q1 residents. Interestingly, this manifest more clearly under TP, in which TTN was significantly shorter in Q4 compared to Q1 residents in bilateral VLPFC, left dorsomedial PFC and right DLPFC channels (eFigure 3b in the Supplement).

| Emitter | Detector | Channel | Gyrus                                      | Prefrontal Subregion       |
|---------|----------|---------|--------------------------------------------|----------------------------|
| 1       | 1        | 1       | Left Inferior Frontal (Pars Triangularis)  | Left Mid-VLPFC             |
| 1       | 2        | 2       | Left Superior Frontal                      | Left Dorsomedial PFC       |
| 2       | 1        | 3       | Left Inferior Frontal (Pars Triangularis)  | Left Mid-VLPFC             |
| 2       | 3        | 4       | Left Inferior Frontal (Pars Triangularis)  | Left Mid-VLPFC             |
| 3       | 1        | 5       | Left Superior Frontal                      | Left Dorsomedial PFC       |
| 3       | 2        | 6       | Left Inferior Frontal (Pars Triangularis)  | Left Mid-VLPFC             |
| 3       | 3        | 7       | Left Superior Frontal                      | Left Dorsomedial PFC       |
| 3       | 4        | 8       | Left Inferior Frontal (Pars Triangularis)  | Left Mid-VLPFC             |
| 4       | 2        | 9       | Left Inferior Frontal (Pars Triangularis)  | Left Mid-VLPFC             |
| 4       | 4        | 10      | Left Superior Frontal                      | Left Dorsomedial PFC       |
| 5       | 3        | 11      | Left Inferior Frontal (Pars Opercularis)   | Left Posterior-VLPFC       |
| 5       | 4        | 12      | Left Superior Frontal                      | Left Dorsomedial PFC       |
| 6       | 5        | 13      | Right Inferior Frontal (Pars Triangularis) | Right Mid-VLPFC            |
| 6       | 6        | 14      | Right Inferior Frontal (Pars Triangularis) | Right Mid-VLPFC            |
| 7       | 5        | 15      | Right Middle Frontal                       | Right DLPFC                |
| 7       | 7        | 16      | Right Inferior Frontal (Pars Triangularis) | Right Mid-VLPFC            |
| 8       | 5        | 17      | Right Inferior Frontal (Pars Opercularis)  | Right Posterior-VLPFC      |
| 8       | 6        | 18      | Right Middle Frontal                       | Right DLPFC                |
| 8       | 7        | 19      | Right Inferior Frontal (Pars Triangularis) | Right Mid-VLPFC            |
| 8       | 8        | 20      | Right Middle Frontal                       | Right DLPFC                |
| 9       | 6        | 21      | Right Inferior Frontal (Pars Triangularis) | Right Mid-VLPFC            |
| 9       | 8        | 22      | Right Precentral                           | Right Primary Motor Cortex |
| 10      | 7        | 23      | Right Inferior Frontal (Pars Triangularis) | Right Mid-VLPFC            |
| 10      | 8        | 24      | Right Inferior Frontal (Pars Opercularis)  | Right Posterior-VLPFC      |

VLPFC: ventrolateral prefrontal cortex; DLPFC: dorsolateral prefrontal cortex

| eTABLE 2. Changes in cortical haemodynamics in each channel in the self-paced condition among Q1 residents |                       |                       |                   |                                      |                      |         |         |       |                         |                      |
|------------------------------------------------------------------------------------------------------------|-----------------------|-----------------------|-------------------|--------------------------------------|----------------------|---------|---------|-------|-------------------------|----------------------|
| Channel                                                                                                    | HbO <sub>2</sub> Rest | HbO <sub>2</sub> Task | ΔHbO <sub>2</sub> | Direction of HbO <sub>2</sub> change | P-value <sup>a</sup> | HHbRest | HHbTask | ΔHHb  | Direction of HHb change | P-value <sup>a</sup> |
| 1                                                                                                          | -0.15                 | 0.07                  | 0.22              | ↑                                    | 0.187                | 0.00    | 0.07    | 0.07  | ↑                       | 0.404                |
| 2                                                                                                          | -0.21                 | 0.11                  | 0.33              | ↑                                    | 0.120                | -0.06   | 0.05    | 0.11  | ↑                       | 0.145                |
| 3                                                                                                          | -0.32                 | 0.00                  | 0.33              | ↑                                    | 0.134                | -0.03   | -0.03   | 0.00  | ↓                       | 0.980                |
| 4                                                                                                          | -0.26                 | 0.06                  | 0.32              | ↑                                    | <b>0.019</b>         | 0.07    | 0.03    | -0.04 | ↓                       | 0.455                |
| 5                                                                                                          | -0.10                 | 0.06                  | 0.16              | ↑                                    | 0.440                | -0.16   | 0.02    | 0.17  | ↑                       | 0.075                |
| 6                                                                                                          | -0.61                 | 0.00                  | 0.61              | ↑                                    | <b>0.001</b>         | 0.06    | 0.02    | -0.04 | ↓                       | 0.481                |
| 7                                                                                                          | -0.18                 | 0.04                  | 0.22              | ↑                                    | 0.107                | 0.14    | 0.06    | -0.08 | ↓                       | 0.251                |
| 8                                                                                                          | -0.41                 | 0.08                  | 0.49              | ↑                                    | 0.209                | -0.06   | -0.07   | 0.00  | ↓                       | 0.997                |
| 9                                                                                                          | -0.39                 | 0.06                  | 0.45              | ↑                                    | <b>&lt;0.001</b>     | 0.11    | 0.03    | -0.08 | ↓                       | 0.144                |
| 10                                                                                                         | -0.22                 | 0.08                  | 0.30              | ↑                                    | 0.096                | 0.00    | 0.04    | 0.04  | ↑                       | 0.643                |
| 11                                                                                                         | -0.61                 | 0.10                  | 0.72              | ↑                                    | <b>&lt;0.001</b>     | 0.10    | 0.01    | -0.09 | ↓                       | 0.081                |
| 12                                                                                                         | -0.66                 | 0.12                  | 0.78              | ↑                                    | <b>&lt;0.001</b>     | 0.10    | -0.03   | -0.13 | ↓                       | 0.090                |
| 13                                                                                                         | -0.20                 | -0.05                 | 0.15              | ↑                                    | 0.311                | -0.04   | 0.05    | 0.09  | ↑                       | 0.128                |
| 14                                                                                                         | -0.59                 | -0.10                 | 0.49              | ↑                                    | <b>0.014</b>         | -0.02   | 0.05    | 0.08  | ↑                       | 0.442                |
| 15                                                                                                         | -0.09                 | 0.10                  | 0.19              | ↑                                    | 0.204                | -0.10   | 0.00    | 0.09  | ↑                       | 0.280                |
| 16                                                                                                         | -0.56                 | -0.06                 | 0.50              | ↑                                    | <b>0.001</b>         | 0.11    | 0.12    | 0.01  | ↑                       | 0.915                |
| 17                                                                                                         | -0.57                 | -0.38                 | 0.19              | ↑                                    | 0.531                | 0.07    | -0.03   | -0.10 | ↓                       | 0.508                |
| 18                                                                                                         | -0.29                 | 0.06                  | 0.35              | ↑                                    | <b>0.004</b>         | 0.11    | 0.02    | -0.09 | ↓                       | 0.191                |
| 19                                                                                                         | -0.95                 | -0.12                 | 0.83              | ↑                                    | <b>&lt;0.001</b>     | 0.10    | 0.04    | -0.05 | ↓                       | 0.578                |
| 20                                                                                                         | -0.28                 | 0.04                  | 0.32              | ↑                                    | <b>0.010</b>         | 0.14    | -0.03   | -0.17 | ↓                       | <b>0.040</b>         |
| 21                                                                                                         | -0.52                 | -0.01                 | 0.51              | ↑                                    | <b>&lt;0.001</b>     | 0.10    | 0.03    | -0.07 | ↓                       | 0.086                |
| 22                                                                                                         | -0.79                 | 0.06                  | 0.85              | ↑                                    | <b>0.002</b>         | 0.11    | -0.19   | -0.29 | ↓                       | 0.163                |
| 23                                                                                                         | -0.27                 | -0.05                 | 0.23              | ↑                                    | 0.053                | 0.18    | -0.02   | -0.19 | ↓                       | <b>0.002</b>         |
| 24                                                                                                         | -0.74                 | 0.03                  | 0.77              | ↑                                    | <b>&lt;0.001</b>     | 0.10    | -0.02   | -0.11 | ↓                       | <b>0.010</b>         |

Oxygenated haemoglobin (HbO<sub>2</sub>) and deoxygenated haemoglobin (HHb) concentrations are measured in micromoles and are averaged across subjects and across trials. Significant changes (p<0.05) in HbO<sub>2</sub> or HHb concentration from rest to task are highlighted in bold. <sup>a</sup>Paired samples t test

| eTABLE 3. Changes in cortical haemodynamics in each channel in the time pressure condition among Q1 residents |                       |                       |                   |                                      |                      |         |         |       |                         |                      |
|---------------------------------------------------------------------------------------------------------------|-----------------------|-----------------------|-------------------|--------------------------------------|----------------------|---------|---------|-------|-------------------------|----------------------|
| Channel                                                                                                       | HbO <sub>2</sub> Rest | HbO <sub>2</sub> Task | ΔHbO <sub>2</sub> | Direction of HbO <sub>2</sub> change | P-value <sup>a</sup> | HHbRest | HHbTask | ΔHHb  | Direction of HHb change | P-value <sup>a</sup> |
| 1                                                                                                             | -0.06                 | 0.10                  | 0.16              | ↑                                    | 0.576                | -0.08   | 0.01    | 0.09  | ↑                       | 0.408                |
| 2                                                                                                             | -0.63                 | 0.08                  | 0.71              | ↑                                    | <b>0.001</b>         | -0.12   | 0.17    | 0.30  | ↑                       | 0.060                |
| 3                                                                                                             | -0.42                 | 0.30                  | 0.72              | ↑                                    | <b>0.006</b>         | -0.03   | 0.02    | 0.05  | ↑                       | 0.711                |
| 4                                                                                                             | -0.39                 | -0.02                 | 0.37              | ↑                                    | 0.052                | -0.02   | 0.15    | 0.17  | ↑                       | 0.080                |
| 5                                                                                                             | -0.14                 | 0.03                  | 0.17              | ↑                                    | 0.560                | -0.06   | 0.07    | 0.13  | ↑                       | 0.446                |
| 6                                                                                                             | -0.39                 | 0.15                  | 0.54              | ↑                                    | <b>0.001</b>         | -0.03   | 0.00    | 0.03  | ↑                       | 0.775                |
| 7                                                                                                             | -0.16                 | 0.00                  | 0.16              | ↑                                    | 0.327                | 0.12    | 0.05    | -0.07 | ↓                       | 0.534                |
| 8                                                                                                             | -0.38                 | 0.26                  | 0.63              | ↑                                    | <b>0.014</b>         | 0.13    | -0.05   | -0.17 | ↓                       | 0.344                |
| 9                                                                                                             | -0.15                 | 0.03                  | 0.18              | ↑                                    | 0.204                | 0.05    | 0.01    | -0.03 | ↓                       | 0.685                |
| 10                                                                                                            | -0.12                 | 0.16                  | 0.28              | ↑                                    | 0.204                | 0.14    | 0.07    | -0.07 | ↓                       | 0.587                |
| 11                                                                                                            | -0.32                 | 0.13                  | 0.45              | ↑                                    | <b>0.024</b>         | 0.13    | -0.02   | -0.15 | ↓                       | 0.057                |
| 12                                                                                                            | -0.29                 | 0.12                  | 0.40              | ↑                                    | <b>0.003</b>         | 0.05    | -0.04   | -0.09 | ↓                       | 0.355                |
| 13                                                                                                            | -0.21                 | 0.11                  | 0.31              | ↑                                    | 0.249                | -0.08   | 0.09    | 0.17  | ↑                       | 0.171                |
| 14                                                                                                            | -0.62                 | 0.06                  | 0.68              | ↑                                    | 0.050                | 0.04    | 0.11    | 0.07  | ↑                       | 0.535                |
| 15                                                                                                            | -0.16                 | 0.26                  | 0.42              | ↑                                    | 0.189                | 0.05    | 0.09    | 0.04  | ↑                       | 0.785                |
| 16                                                                                                            | -0.30                 | 0.11                  | 0.41              | ↑                                    | <b>0.030</b>         | 0.05    | 0.07    | 0.02  | ↑                       | 0.790                |
| 17                                                                                                            | -1.07                 | 0.15                  | 1.23              | ↑                                    | <b>0.022</b>         | 0.50    | 0.15    | -0.36 | ↓                       | 0.098                |
| 18                                                                                                            | -0.15                 | 0.07                  | 0.23              | ↑                                    | 0.293                | 0.09    | 0.04    | -0.05 | ↓                       | 0.610                |
| 19                                                                                                            | -0.61                 | 0.07                  | 0.68              | ↑                                    | <b>0.002</b>         | 0.08    | -0.05   | -0.13 | ↓                       | 0.089                |
| 20                                                                                                            | -0.03                 | -0.05                 | -0.02             | ↓                                    | 0.945                | 0.19    | -0.03   | -0.22 | ↓                       | 0.085                |
| 21                                                                                                            | -0.11                 | 0.04                  | 0.15              | ↑                                    | 0.234                | 0.00    | 0.03    | 0.03  | ↑                       | 0.485                |
| 22                                                                                                            | -0.62                 | 0.07                  | 0.69              | ↑                                    | <b>&lt;0.001</b>     | 0.05    | 0.03    | -0.02 | ↓                       | 0.835                |
| 23                                                                                                            | -0.01                 | -0.03                 | -0.02             | ↓                                    | 0.889                | 0.08    | -0.06   | -0.13 | ↓                       | 0.075                |
| 24                                                                                                            | -0.43                 | 0.10                  | 0.53              | ↑                                    | <b>&lt;0.001</b>     | 0.15    | 0.04    | -0.11 | ↓                       | 0.073                |

Oxygenated haemoglobin (HbO<sub>2</sub>) and deoxygenated haemoglobin (HHb) concentrations are measured in micromoles and are averaged across subjects and across trials. Significant changes (p<0.05) in HbO<sub>2</sub> or HHb concentration from rest to task are highlighted in bold. <sup>a</sup>Paired samples t test

| eTABLE 4. Changes in cortical haemodynamics in each channel in the self-paced condition among Q4 residents |                       |                       |                   |                                      |                      |         |         |       |                         |                      |
|------------------------------------------------------------------------------------------------------------|-----------------------|-----------------------|-------------------|--------------------------------------|----------------------|---------|---------|-------|-------------------------|----------------------|
| Channel                                                                                                    | HbO <sub>2</sub> Rest | HbO <sub>2</sub> Task | ΔHbO <sub>2</sub> | Direction of HbO <sub>2</sub> change | P-value <sup>a</sup> | HHbRest | HHbTask | ΔHHb  | Direction of HHb change | P-value <sup>a</sup> |
| 1                                                                                                          | 0.28                  | -0.36                 | -0.64             | ↓                                    | 0.199                | 0.30    | 0.17    | -0.14 | ↓                       | 0.326                |
| 2                                                                                                          | 0.45                  | -0.13                 | -0.57             | ↓                                    | 0.192                | 0.10    | 0.12    | 0.02  | ↑                       | 0.906                |
| 3                                                                                                          | 0.17                  | -0.45                 | -0.62             | ↓                                    | 0.172                | 0.25    | 0.30    | 0.05  | ↑                       | 0.805                |
| 4                                                                                                          | -0.02                 | -0.22                 | -0.20             | ↓                                    | 0.343                | 0.25    | 0.09    | -0.17 | ↓                       | <b>0.018</b>         |
| 5                                                                                                          | 0.20                  | -0.09                 | -0.29             | ↓                                    | 0.359                | 0.07    | 0.14    | 0.07  | ↑                       | 0.656                |
| 6                                                                                                          | -0.44                 | -0.45                 | -0.01             | ↓                                    | 0.974                | 0.18    | 0.23    | 0.04  | ↑                       | 0.772                |
| 7                                                                                                          | -0.09                 | -0.20                 | -0.10             | ↓                                    | 0.717                | 0.12    | 0.09    | -0.03 | ↓                       | 0.817                |
| 8                                                                                                          | -0.31                 | -0.21                 | 0.10              | ↑                                    | 0.685                | 0.25    | 0.20    | -0.05 | ↓                       | 0.771                |
| 9                                                                                                          | -0.05                 | -0.11                 | -0.05             | ↓                                    | 0.777                | 0.09    | 0.05    | -0.04 | ↓                       | 0.418                |
| 10                                                                                                         | -0.16                 | 0.00                  | 0.16              | ↑                                    | 0.372                | 0.18    | 0.14    | -0.04 | ↓                       | 0.692                |
| 11                                                                                                         | -0.10                 | -0.18                 | -0.08             | ↓                                    | 0.798                | 0.30    | 0.10    | -0.20 | ↓                       | <b>0.039</b>         |
| 12                                                                                                         | -0.11                 | -0.19                 | -0.07             | ↓                                    | 0.657                | 0.06    | 0.01    | -0.05 | ↓                       | 0.433                |
| 13                                                                                                         | 0.14                  | -0.23                 | -0.37             | ↓                                    | 0.160                | 0.25    | 0.11    | -0.14 | ↓                       | 0.113                |
| 14                                                                                                         | -0.60                 | -0.29                 | 0.31              | ↑                                    | 0.426                | 0.20    | 0.16    | -0.04 | ↓                       | 0.833                |
| 15                                                                                                         | -0.11                 | -0.01                 | 0.10              | ↑                                    | 0.613                | 0.21    | 0.14    | -0.08 | ↓                       | 0.473                |
| 16                                                                                                         | -0.28                 | -0.29                 | -0.01             | ↓                                    | 0.980                | 0.21    | 0.12    | -0.10 | ↓                       | 0.195                |
| 17                                                                                                         | -0.05                 | -0.13                 | -0.09             | ↓                                    | 0.839                | 0.35    | 0.38    | 0.03  | ↑                       | 0.917                |
| 18                                                                                                         | 0.01                  | -0.09                 | -0.10             | ↓                                    | 0.708                | 0.22    | 0.05    | -0.16 | ↓                       | <b>0.003</b>         |
| 19                                                                                                         | 0.10                  | -0.24                 | -0.34             | ↓                                    | 0.370                | 0.40    | 0.19    | -0.21 | ↓                       | 0.107                |
| 20                                                                                                         | -0.27                 | -0.11                 | 0.17              | ↑                                    | 0.282                | 0.13    | 0.04    | -0.09 | ↓                       | 0.090                |
| 21                                                                                                         | 0.23                  | -0.09                 | -0.33             | ↓                                    | 0.310                | 0.16    | 0.05    | -0.11 | ↓                       | 0.080                |
| 22                                                                                                         | 0.08                  | -0.02                 | -0.10             | ↓                                    | 0.727                | 0.42    | 0.17    | -0.25 | ↓                       | 0.137                |
| 23                                                                                                         | 0.01                  | -0.10                 | -0.11             | ↓                                    | 0.571                | 0.08    | 0.03    | -0.05 | ↓                       | 0.313                |
| 24                                                                                                         | 0.08                  | -0.21                 | -0.29             | ↓                                    | 0.494                | 0.35    | 0.06    | -0.28 | ↓                       | <b>0.007</b>         |

Oxygenated haemoglobin (HbO<sub>2</sub>) and deoxygenated haemoglobin (HHb) concentrations are measured in micromoles and are averaged across subjects and across trials. Significant changes (p<0.05) in HbO<sub>2</sub> or HHb concentration from rest to task are highlighted in bold. <sup>a</sup>Paired samples t test



| eTABLE 5. Changes in cortical haemodynamics in each channel in the time pressure condition among Q4 residents |                       |                       |                   |                                      |                      |         |         |       |                         |                      |
|---------------------------------------------------------------------------------------------------------------|-----------------------|-----------------------|-------------------|--------------------------------------|----------------------|---------|---------|-------|-------------------------|----------------------|
| Channel                                                                                                       | HbO <sub>2</sub> Rest | HbO <sub>2</sub> Task | ΔHbO <sub>2</sub> | Direction of HbO <sub>2</sub> change | P-value <sup>a</sup> | HHbRest | HHbTask | ΔHHb  | Direction of HHb change | P-value <sup>a</sup> |
| 1                                                                                                             | -0.15                 | -0.55                 | -0.40             | ↓                                    | 0.220                | -0.02   | 0.10    | 0.12  | ↑                       | 0.538                |
| 2                                                                                                             | 0.20                  | -0.09                 | -0.29             | ↓                                    | 0.432                | 0.19    | 0.09    | -0.09 | ↓                       | 0.636                |
| 3                                                                                                             | -0.96                 | -0.67                 | 0.29              | ↑                                    | 0.481                | 0.33    | 0.52    | 0.19  | ↑                       | 0.626                |
| 4                                                                                                             | -0.03                 | -0.40                 | -0.37             | ↓                                    | <b>0.018</b>         | 0.06    | 0.00    | -0.06 | ↓                       | 0.764                |
| 5                                                                                                             | -0.20                 | -0.11                 | 0.09              | ↑                                    | 0.815                | -0.02   | 0.11    | 0.13  | ↑                       | 0.657                |
| 6                                                                                                             | -0.80                 | -0.46                 | 0.34              | ↑                                    | 0.181                | -0.01   | 0.33    | 0.34  | ↑                       | 0.106                |
| 7                                                                                                             | 0.14                  | -0.18                 | -0.32             | ↓                                    | 0.226                | 0.13    | 0.02    | -0.11 | ↓                       | 0.542                |
| 8                                                                                                             | -0.76                 | -0.03                 | 0.73              | ↑                                    | <b>0.019</b>         | 0.19    | 0.43    | 0.24  | ↑                       | 0.324                |
| 9                                                                                                             | -0.14                 | -0.35                 | -0.21             | ↓                                    | 0.255                | -0.07   | 0.00    | 0.07  | ↑                       | 0.440                |
| 10                                                                                                            | -0.15                 | -0.19                 | -0.03             | ↓                                    | 0.931                | 0.20    | 0.05    | -0.15 | ↓                       | 0.527                |
| 11                                                                                                            | 0.35                  | -0.27                 | -0.62             | ↓                                    | <b>0.041</b>         | 0.25    | 0.05    | -0.21 | ↓                       | 0.138                |
| 12                                                                                                            | 0.61                  | -0.21                 | -0.82             | ↓                                    | <b>0.016</b>         | 0.13    | -0.02   | -0.15 | ↓                       | 0.213                |
| 13                                                                                                            | 0.53                  | -0.11                 | -0.64             | ↓                                    | <b>0.048</b>         | 0.04    | 0.14    | 0.10  | ↑                       | 0.356                |
| 14                                                                                                            | -0.20                 | -0.70                 | -0.50             | ↓                                    | 0.304                | -0.07   | 0.31    | 0.37  | ↑                       | 0.105                |
| 15                                                                                                            | -0.09                 | -0.10                 | -0.01             | ↓                                    | 0.985                | -0.22   | 0.24    | 0.46  | ↑                       | 0.091                |
| 16                                                                                                            | 0.26                  | -0.37                 | -0.62             | ↓                                    | <b>0.019</b>         | 0.05    | 0.11    | 0.06  | ↑                       | 0.563                |
| 17                                                                                                            | -0.69                 | -0.57                 | 0.12              | ↑                                    | 0.778                | -0.24   | 0.69    | 0.93  | ↑                       | <b>0.020</b>         |
| 18                                                                                                            | -0.22                 | -0.19                 | 0.02              | ↑                                    | 0.886                | -0.11   | 0.06    | 0.18  | ↑                       | 0.220                |
| 19                                                                                                            | -0.35                 | -0.28                 | 0.07              | ↑                                    | 0.704                | 0.09    | 0.24    | 0.15  | ↑                       | 0.340                |
| 20                                                                                                            | -0.07                 | -0.04                 | 0.03              | ↑                                    | 0.874                | 0.03    | 0.10    | 0.07  | ↑                       | 0.587                |
| 21                                                                                                            | -0.01                 | -0.13                 | -0.12             | ↓                                    | 0.555                | 0.05    | 0.05    | 0.01  | ↑                       | 0.948                |
| 22                                                                                                            | -0.18                 | -0.24                 | -0.05             | ↓                                    | 0.838                | 0.18    | 0.23    | 0.06  | ↑                       | 0.767                |
| 23                                                                                                            | 0.26                  | -0.13                 | -0.39             | ↓                                    | 0.118                | 0.02    | 0.04    | 0.02  | ↑                       | 0.752                |
| 24                                                                                                            | 0.27                  | -0.21                 | -0.48             | ↓                                    | 0.140                | 0.26    | -0.03   | -0.29 | ↓                       | <b>0.006</b>         |

Oxygenated haemoglobin (HbO<sub>2</sub>) and deoxygenated haemoglobin (HHb) concentrations are measured in micromoles and are averaged across subjects and across trials. Significant changes (p<0.05) in HbO<sub>2</sub> or HHb concentration from rest to task are highlighted in bold. <sup>a</sup>Paired samples t test

| Channel | $\Delta\text{HbO}_2$ (Self-Paced) | $\Delta\text{HbO}_2$ (Time Pressure) | Change in $\Delta\text{HbO}_2$ | Direction of $\Delta\text{HbO}_2$ change | P-value <sup>a</sup> |
|---------|-----------------------------------|--------------------------------------|--------------------------------|------------------------------------------|----------------------|
| 1       | 0.22                              | 0.16                                 | -0.06                          | ↓                                        | 0.841                |
| 2       | 0.33                              | 0.71                                 | 0.38                           | ↑                                        | 0.118                |
| 3       | 0.33                              | 0.72                                 | 0.39                           | ↑                                        | 0.285                |
| 4       | 0.32                              | 0.37                                 | 0.05                           | ↑                                        | 0.835                |
| 5       | 0.16                              | 0.17                                 | 0.01                           | ↑                                        | 0.972                |
| 6       | 0.61                              | 0.54                                 | -0.06                          | ↓                                        | 0.698                |
| 7       | 0.22                              | 0.16                                 | -0.07                          | ↓                                        | 0.758                |
| 8       | 0.49                              | 0.63                                 | 0.14                           | ↑                                        | 0.780                |
| 9       | 0.45                              | 0.18                                 | -0.27                          | ↓                                        | 0.068                |
| 10      | 0.30                              | 0.28                                 | -0.02                          | ↓                                        | 0.946                |
| 11      | 0.72                              | 0.45                                 | -0.26                          | ↓                                        | 0.136                |
| 12      | 0.78                              | 0.40                                 | -0.38                          | ↓                                        | 0.060                |
| 13      | 0.15                              | 0.31                                 | 0.17                           | ↑                                        | 0.426                |
| 14      | 0.49                              | 0.68                                 | 0.19                           | ↑                                        | 0.591                |
| 15      | 0.19                              | 0.42                                 | 0.23                           | ↑                                        | 0.439                |
| 16      | 0.50                              | 0.41                                 | -0.09                          | ↓                                        | 0.671                |
| 17      | 0.19                              | 1.23                                 | 1.03                           | ↑                                        | 0.097                |
| 18      | 0.35                              | 0.23                                 | -0.12                          | ↓                                        | 0.570                |
| 19      | 0.95                              | 0.68                                 | -0.27                          | ↓                                        | 0.165                |
| 20      | 0.26                              | -0.02                                | -0.27                          | ↓                                        | 0.255                |
| 21      | 0.51                              | 0.15                                 | -0.36                          | ↓                                        | <b>0.011</b>         |
| 22      | 0.91                              | 0.69                                 | -0.23                          | ↓                                        | 0.471                |
| 23      | 0.23                              | -0.02                                | -0.24                          | ↓                                        | 0.151                |
| 24      | 0.77                              | 0.53                                 | -0.24                          | ↓                                        | <b>0.046</b>         |

Change in oxygenated haemoglobin concentration ( $\Delta\text{HbO}_2$ ) is measured in micromoles and is averaged across subjects and across trials. Significant differences ( $p < 0.05$ ) in  $\Delta\text{HbO}_2$  between conditions are highlighted in bold. <sup>a</sup>Paired samples t test

| eTABLE 7. Differences in $\Delta\text{HbO}_2$ between conditions in each channel among Q4 residents |                                   |                                      |                                |                                          |                      |
|-----------------------------------------------------------------------------------------------------|-----------------------------------|--------------------------------------|--------------------------------|------------------------------------------|----------------------|
| Channel                                                                                             | $\Delta\text{HbO}_2$ (Self-Paced) | $\Delta\text{HbO}_2$ (Time Pressure) | Change in $\Delta\text{HbO}_2$ | Direction of $\Delta\text{HbO}_2$ change | P-value <sup>a</sup> |
| 1                                                                                                   | -0.64                             | -0.40                                | 0.24                           | ↑                                        | 0.613                |
| 2                                                                                                   | -0.57                             | -0.35                                | 0.22                           | ↑                                        | 0.664                |
| 3                                                                                                   | -0.62                             | 0.38                                 | 1.01                           | ↑                                        | <b>0.043</b>         |
| 4                                                                                                   | -0.20                             | -0.39                                | -0.19                          | ↓                                        | 0.363                |
| 5                                                                                                   | -0.29                             | 0.04                                 | 0.33                           | ↑                                        | 0.502                |
| 6                                                                                                   | -0.01                             | 0.35                                 | 0.36                           | ↑                                        | 0.311                |
| 7                                                                                                   | -0.10                             | -0.29                                | -0.19                          | ↓                                        | 0.622                |
| 8                                                                                                   | 0.10                              | 0.77                                 | 0.67                           | ↑                                        | 0.092                |
| 9                                                                                                   | -0.05                             | -0.20                                | -0.15                          | ↓                                        | 0.525                |
| 10                                                                                                  | 0.16                              | 0.07                                 | -0.09                          | ↓                                        | 0.823                |
| 11                                                                                                  | -0.08                             | -0.56                                | -0.48                          | ↓                                        | 0.142                |
| 12                                                                                                  | -0.07                             | -0.73                                | -0.65                          | ↓                                        | 0.053                |
| 13                                                                                                  | -0.37                             | -0.65                                | -0.28                          | ↓                                        | 0.434                |
| 14                                                                                                  | 0.31                              | -0.46                                | -0.77                          | ↓                                        | 0.086                |
| 15                                                                                                  | 0.10                              | -0.02                                | -0.12                          | ↓                                        | 0.740                |
| 16                                                                                                  | -0.01                             | -0.62                                | -0.61                          | ↓                                        | 0.056                |
| 17                                                                                                  | -0.09                             | 0.14                                 | 0.23                           | ↑                                        | 0.626                |
| 18                                                                                                  | -0.10                             | 0.01                                 | 0.11                           | ↑                                        | 0.635                |
| 19                                                                                                  | -0.34                             | 0.06                                 | 0.39                           | ↑                                        | 0.219                |
| 20                                                                                                  | 0.17                              | 0.05                                 | -0.12                          | ↓                                        | 0.582                |
| 21                                                                                                  | -0.33                             | -0.11                                | 0.22                           | ↑                                        | 0.430                |
| 22                                                                                                  | -0.10                             | 0.01                                 | 0.11                           | ↑                                        | 0.737                |
| 23                                                                                                  | -0.11                             | -0.37                                | -0.26                          | ↓                                        | 0.389                |
| 24                                                                                                  | -0.29                             | -0.40                                | -0.11                          | ↓                                        | 0.795                |

Change in oxygenated haemoglobin concentration ( $\Delta\text{HbO}_2$ ) is measured in micromoles and is averaged across subjects and across trials. Significant differences ( $p < 0.05$ ) in  $\Delta\text{HbO}_2$  between conditions are highlighted in bold. <sup>a</sup>Paired samples t test

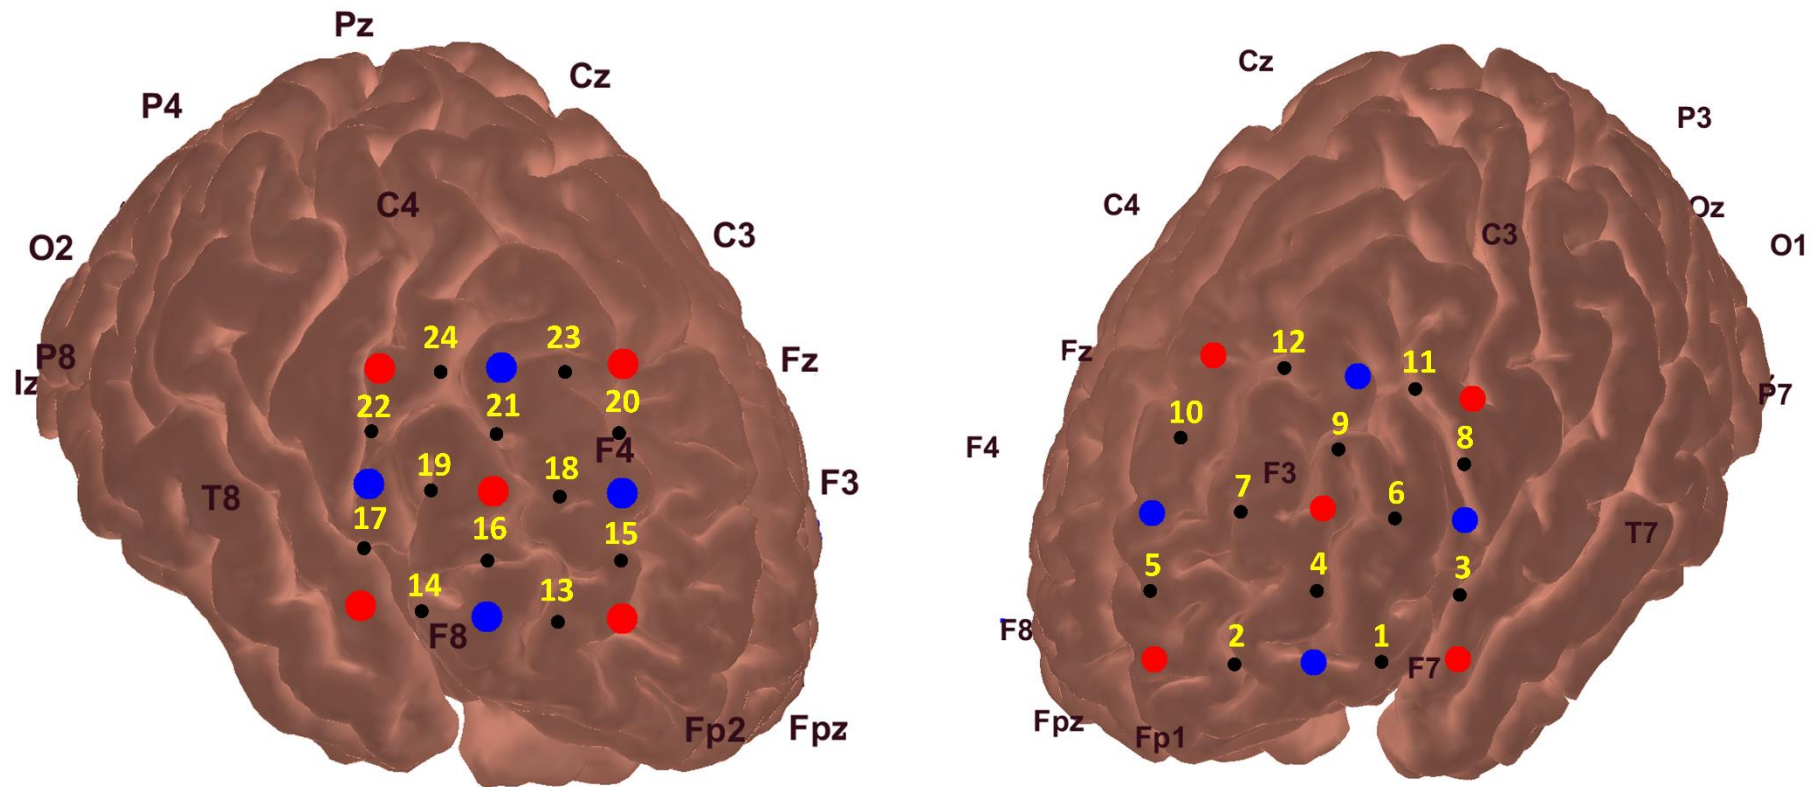

**eFigure 1. Prefrontal Channel Positions.** Near-infrared light emitter (red) and detector (blue) positions are aligned to the international 10-5 system of optode placement (reference points labelled in black). An emitter-detector pair constitutes a data collection 'channel' (black dots) and are labelled 1 to 24. Channel positional data were captured using a 3D electromagnetic probe-positioning digitizer (Polhemus, Hitachi Medical Corp., Japan) and projected onto a magnetic resonance image to visualise the cortical structures underlying each channel.

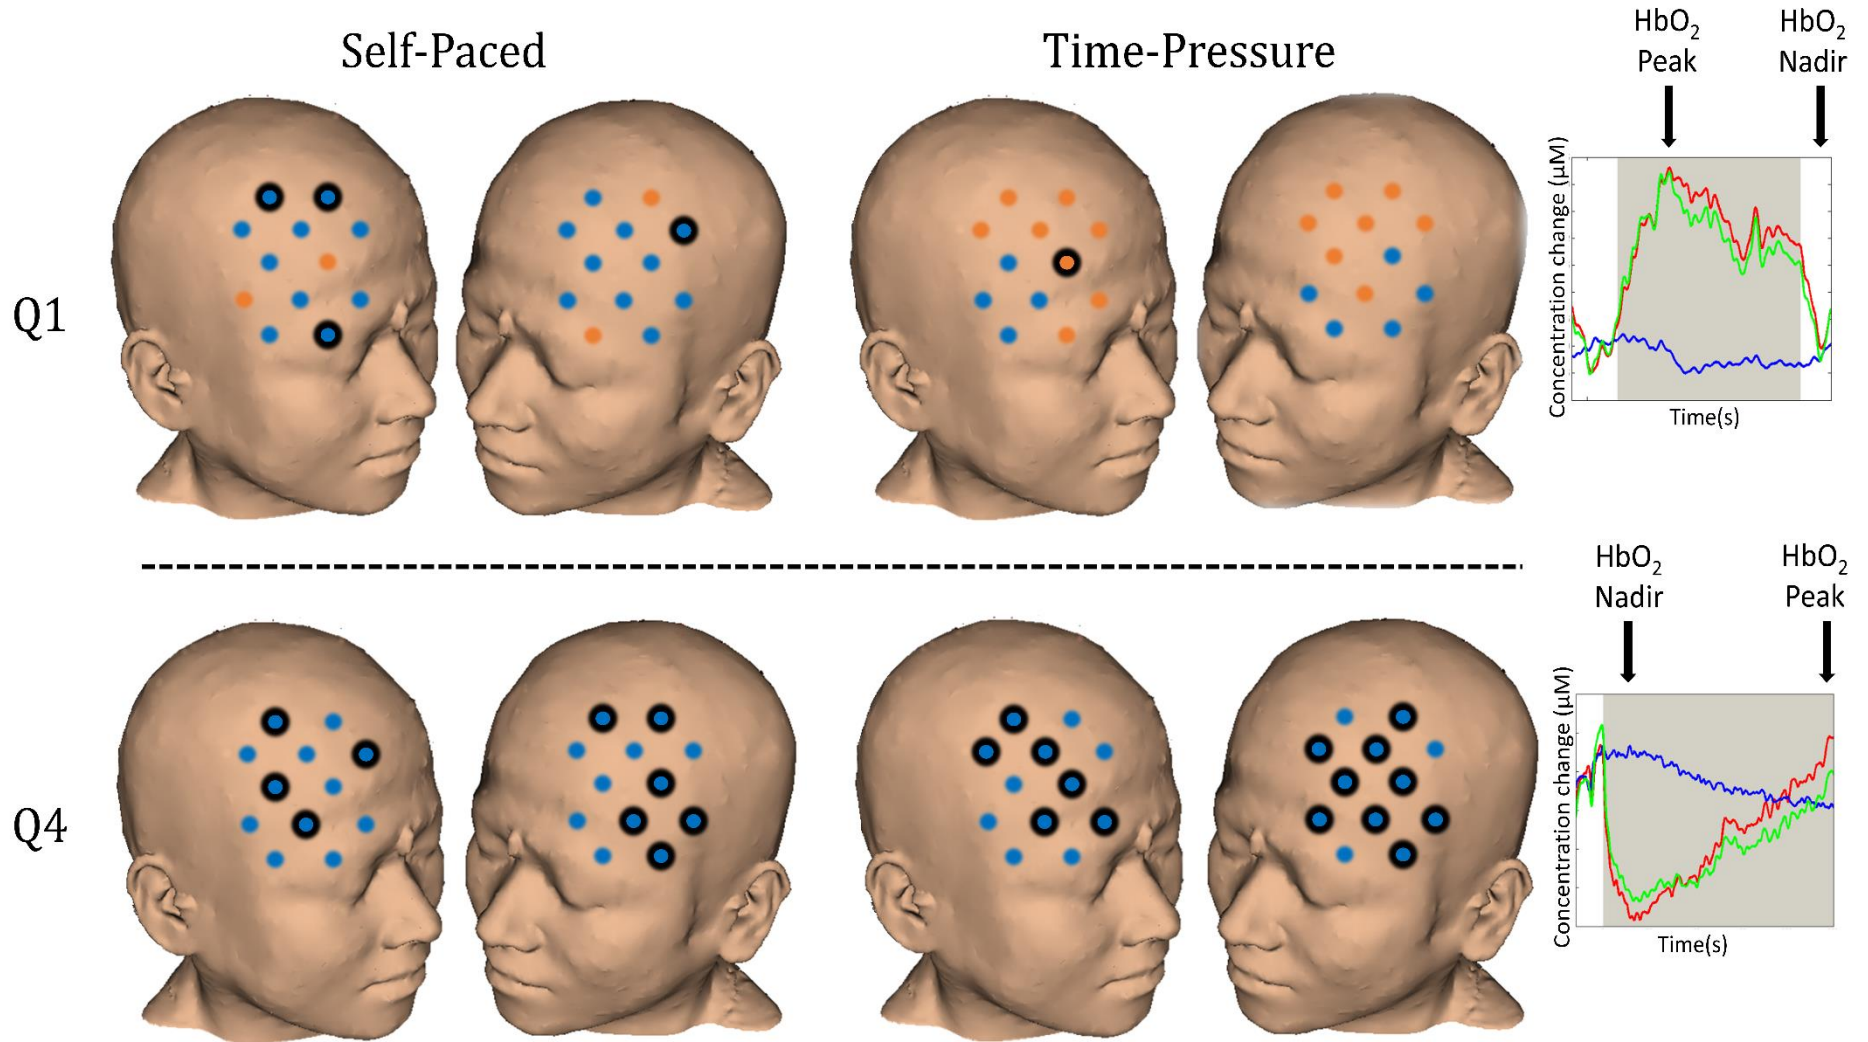

**eFigure 2. Within-group comparison of time to HbO<sub>2</sub> concentration peak and time to HbO<sub>2</sub> concentration nadir.** Channels in which HbO<sub>2</sub> concentration peaks before it reaches a nadir (i.e. an activation response) are shown in orange, and those in which HbO<sub>2</sub> concentration reaches its nadir earlier than its peak (i.e. a deactivation response) are shown in blue. Channels in which there was a significant difference ( $p < 0.05$ , Wilcoxon Signed Ranks test) between the time to peak and time to nadir are outlined (black circle). In the Q1 group, time to HbO<sub>2</sub> peak was shorter than the time to nadir (activation) in the bilateral VLPFC and right DLPFC during the time pressure condition. In the Q4 group, time to HbO<sub>2</sub> peak was longer

than the time to nadir (deactivation) in the bilateral VLPFC in the self-paced condition, and in the bilateral VLPFC and right DLPFC in the time pressure condition. Example time-courses from each group depicting the temporal relationship between HbO<sub>2</sub> peak and HbO<sub>2</sub> nadir are shown.

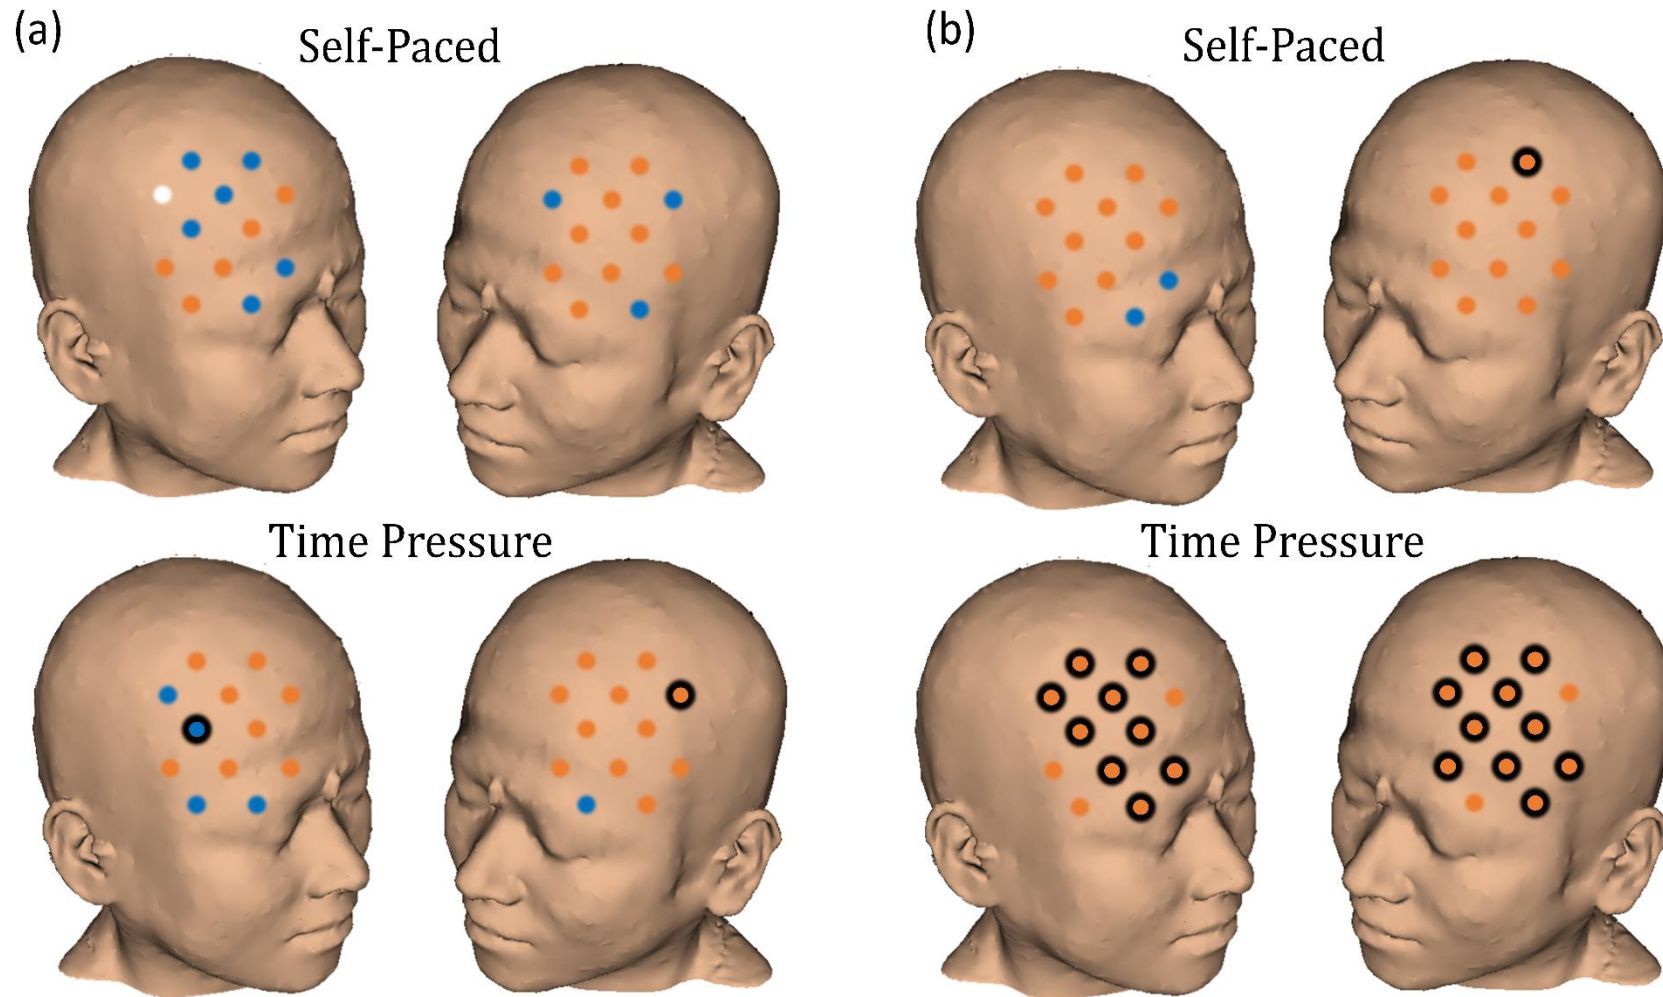

**eFigure 3. Between-group comparison of time to HbO<sub>2</sub> concentration peak and time to HbO<sub>2</sub> concentration nadir.** (a) Between-group comparisons of median time to HbO<sub>2</sub> peak. Channels in which HbO<sub>2</sub> concentration peaks earlier in Q1 than in Q4 are shown in orange, and those in which HbO<sub>2</sub> concentration peaks earlier in Q4 than in Q1 are shown in blue. Channels where time to peak is the same in both groups are coloured white. (b) Between-group comparisons of median time to HbO<sub>2</sub> nadir. Channels in which HbO<sub>2</sub> concentration reaches its nadir earlier in Q4 than in Q1 are shown in orange, and those in which HbO<sub>2</sub> concentration reaches a nadir earlier in Q1 than in Q4 are shown in blue. Channels where there are significant between-group differences in the time to peak or time to nadir are outlined (black circle).



(a)

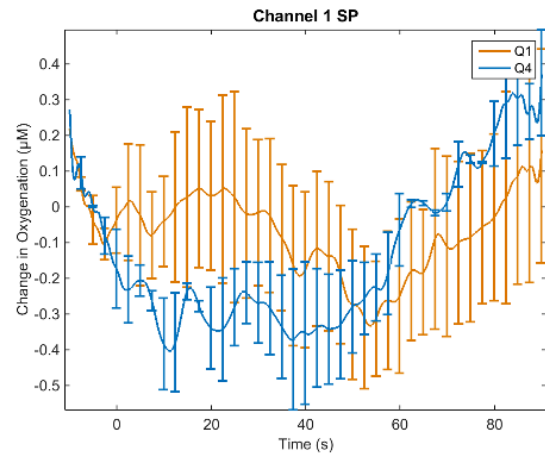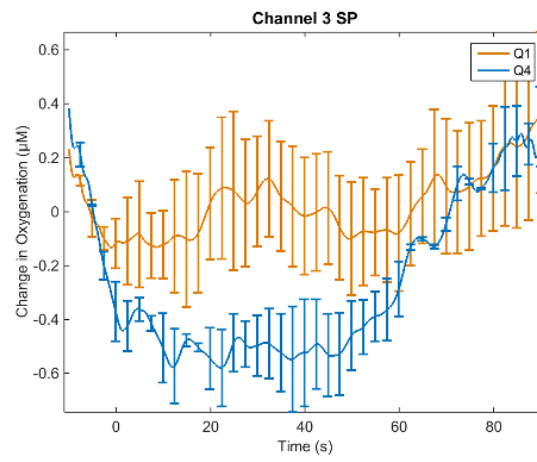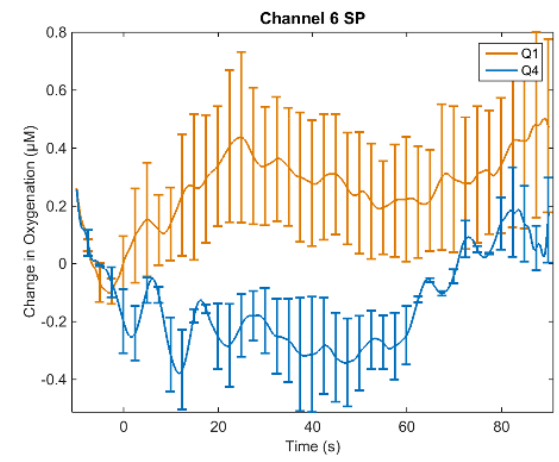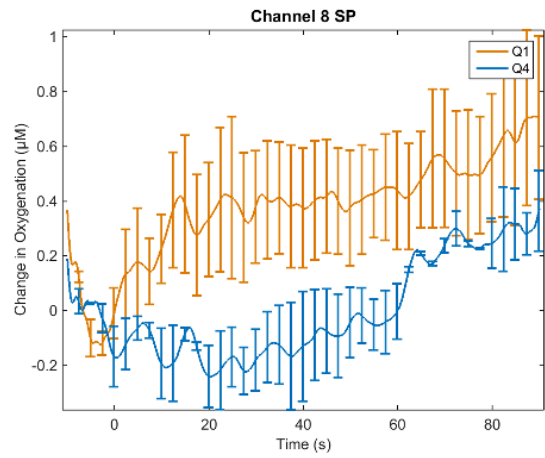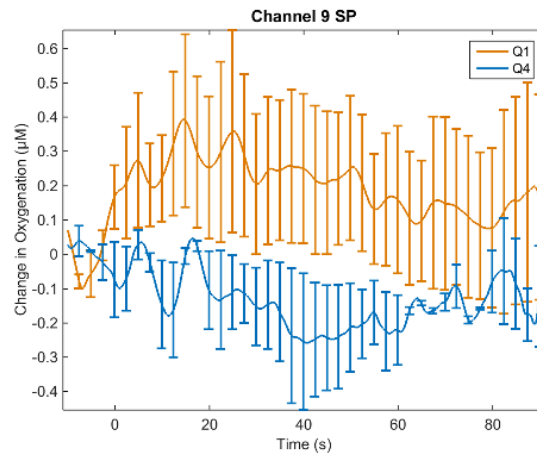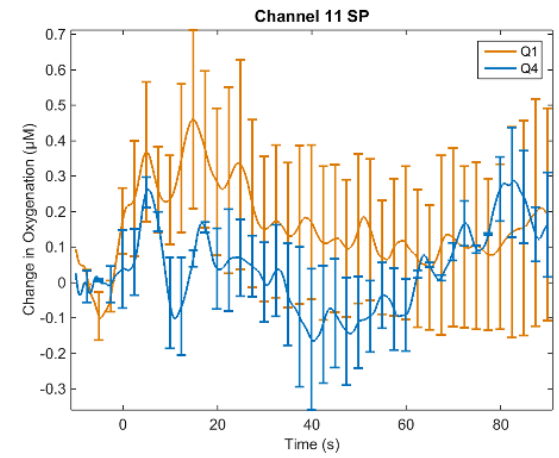



(b)

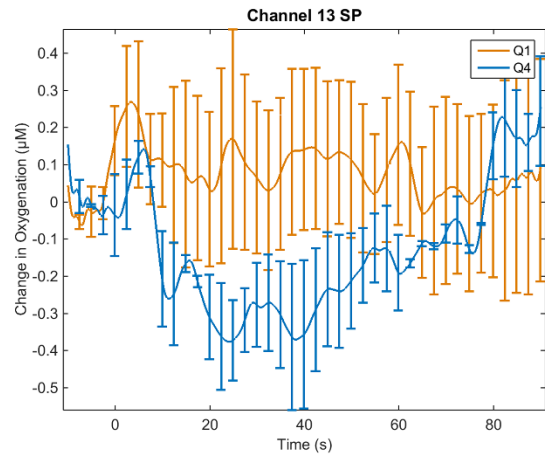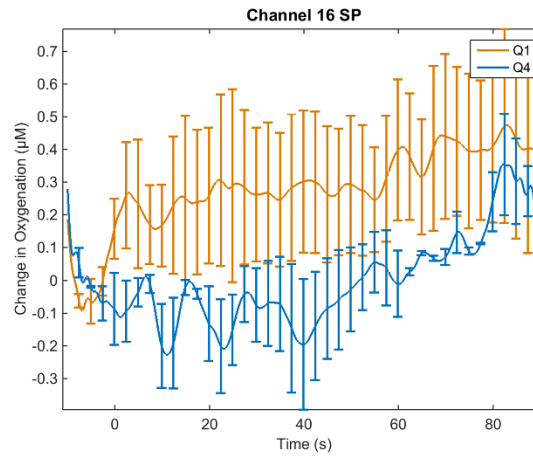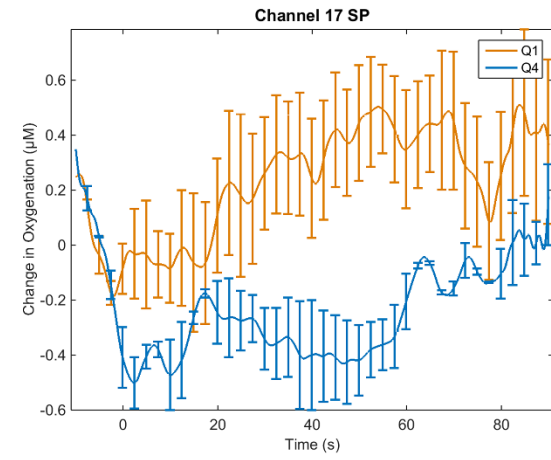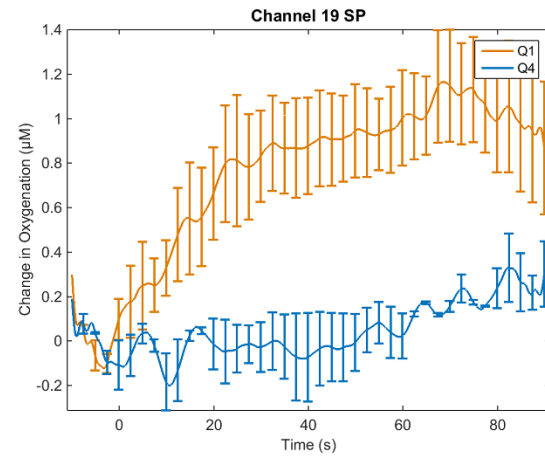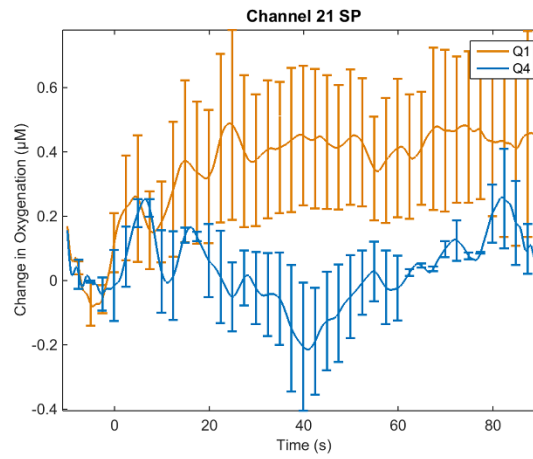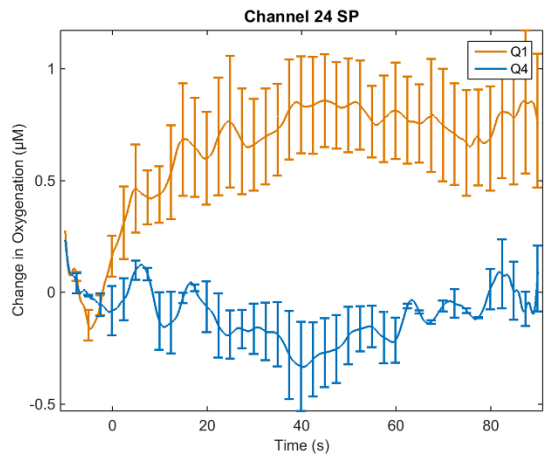

(c)

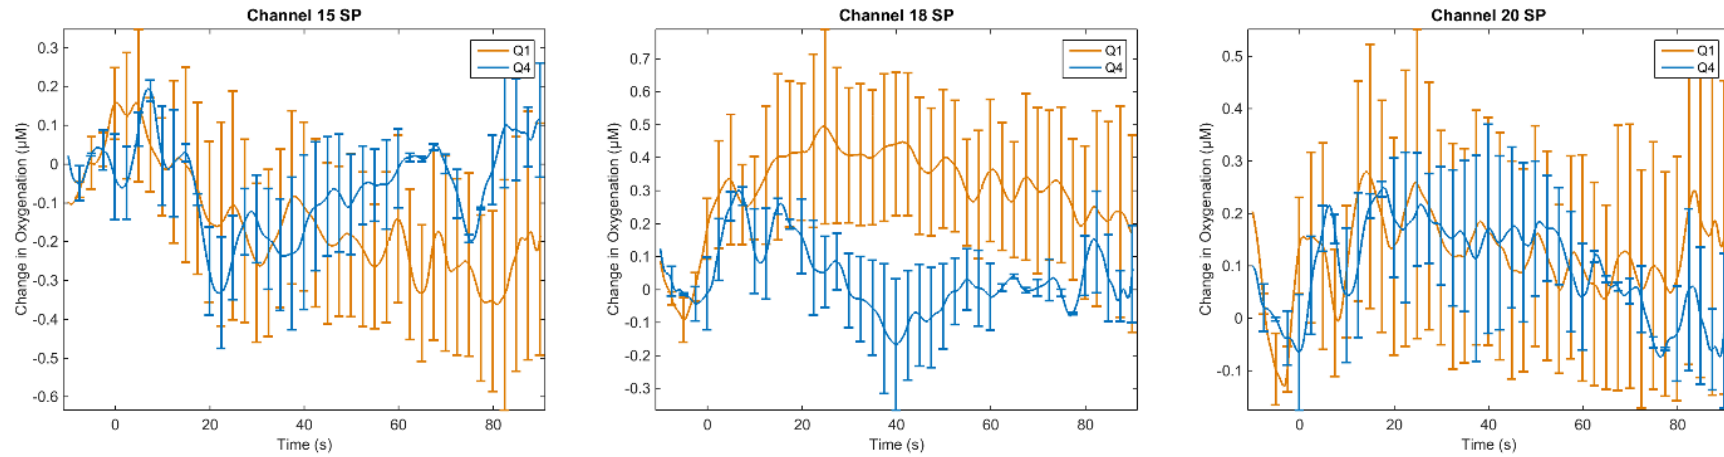

**eFigure 4. Time courses demonstrating the change in oxygenated haemoglobin in individual channels in Q1 and Q4 residents during the self-paced condition.** (a) left ventrolateral PFC, (b) right ventrolateral PFC, and (c) right dorsolateral PFC. Error bars represent standard deviations.

(a)

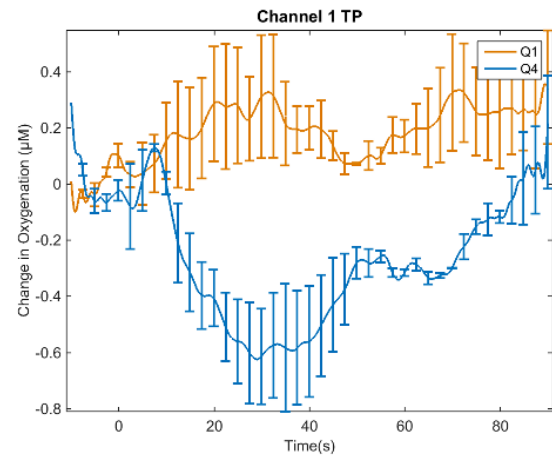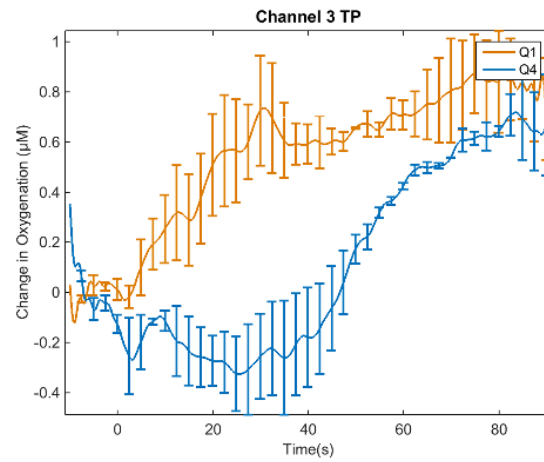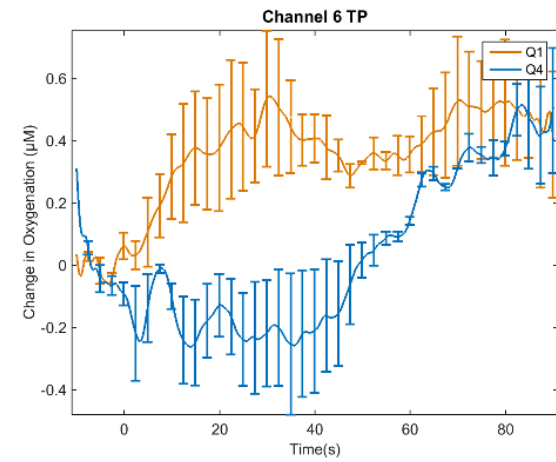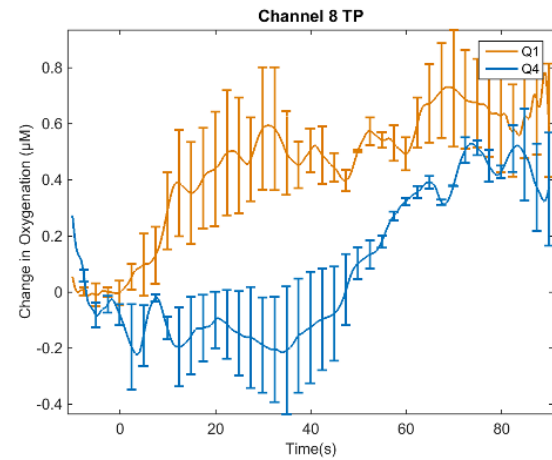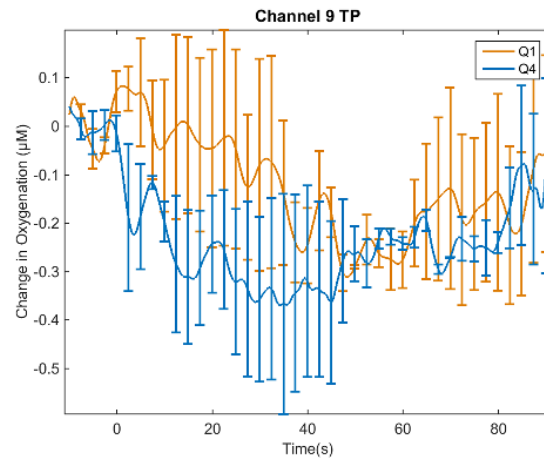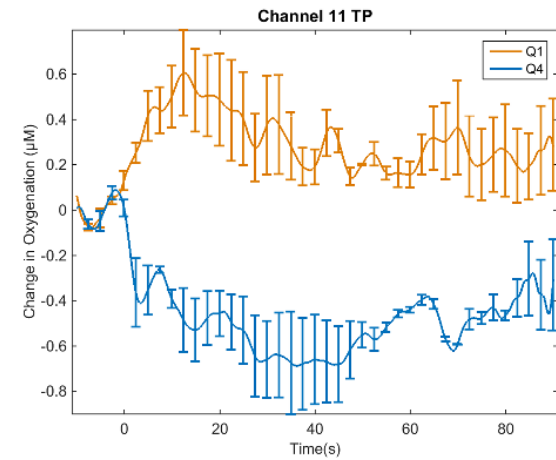

(b)

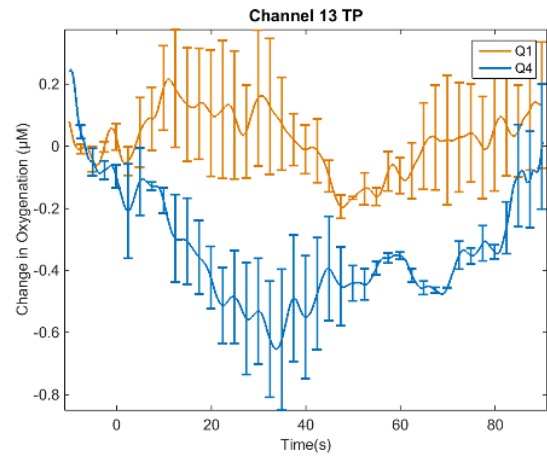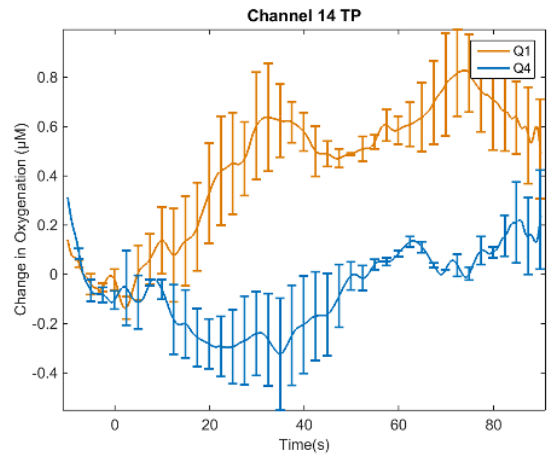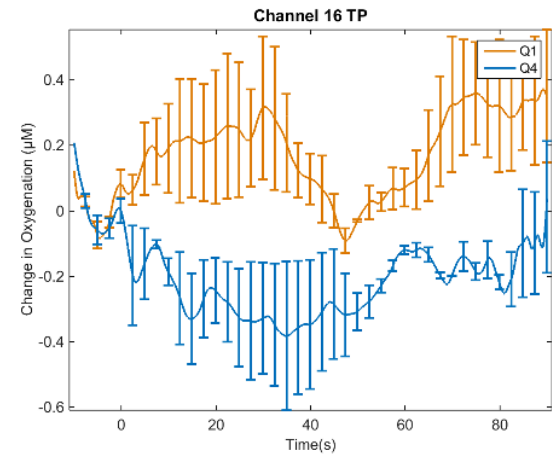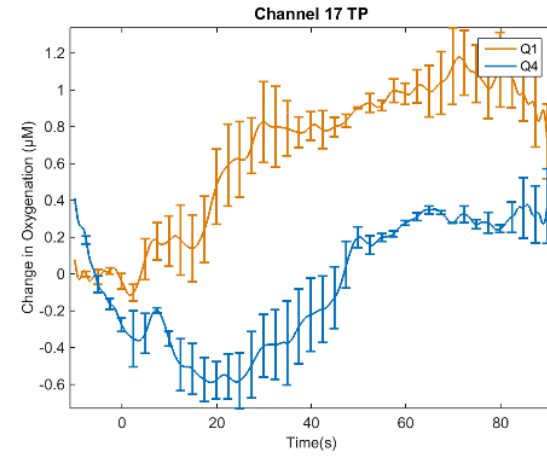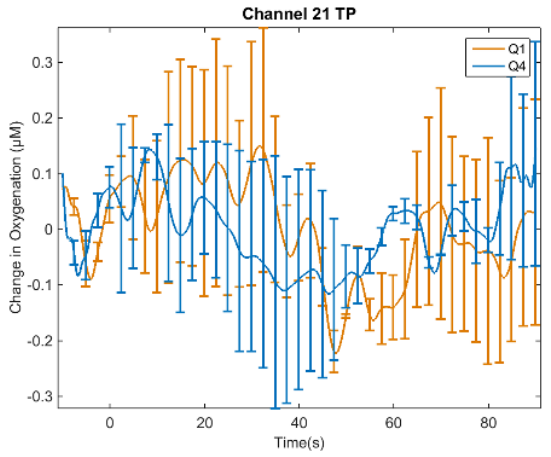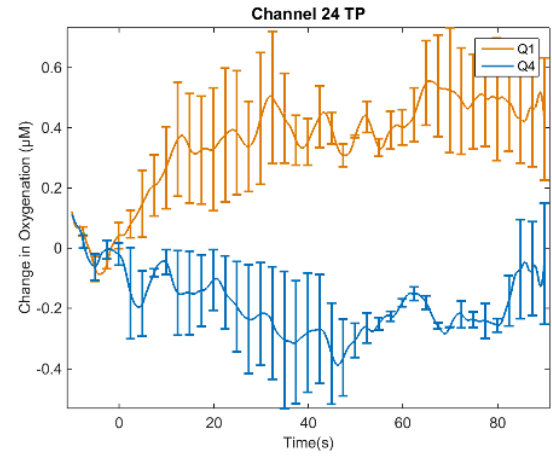

(c)

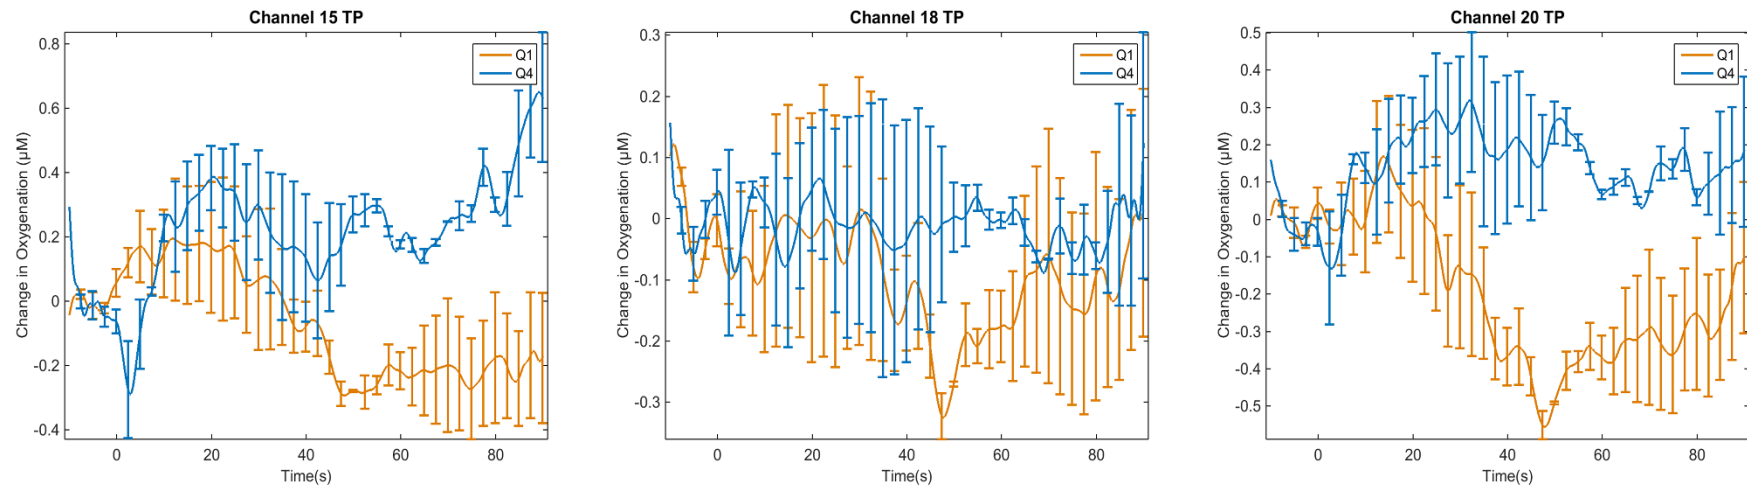

**eFigure 5. Time courses demonstrating the change in oxygenated haemoglobin in individual channels in Q1 and Q4 residents during the time pressure condition.** (a) left ventrolateral PFC, (b) right ventrolateral PFC, and (c) right dorsolateral PFC. Error bars represent standard deviations.
